# Supplementary material for: Zebrafish aversion to infrasound in an open field test
Source: Front Behav Neurosci. 2023 Jan 6;16:1019368. doi: 10.3389/fnbeh.2022.1019368 (PMC9852910; doi:10.3389/fnbeh.2022.1019368)
Supplement: Supplementary file 1 [file Data_Sheet_1.xlsx]

## Sheet: Habituation Trial
Distance Moved (cm)						Immobility (seconds)						Time in 4.8 cm Thigmotaxis Zone (seconds)
0 Hz	5 Hz	10 Hz	15 Hz	20 Hz		0 Hz	5 Hz	10 Hz	15 Hz	20 Hz		0 Hz	5 Hz	10 Hz	15 Hz	20 Hz
3637.52	3666.1	2380.54	1500.73	2874.96		10.44	0.24	0.64	57.12	0.44		280.56	280.56	272.52	290.28	282.2
3327.5	2551.18	2102.23	2936.98	2219.2		1.32	5.12	2.32	0.68	56.2		270.64	270.64	269.32	220.2	215.32
2203.01	2185.93	2503.19	3629.88	4240.84		12.8	9.16	1.4	0.48	0.04		279.76	279.76	169.64	297.52	206.52
2149.9	1946.42	2779.1	4486.1	1843.04		9.68	18.2	11.84	0.08	10.32		229.76	245.16	200.04	248.32	275
2148.77	3015.87	2764.59	2230.82	3044.22		56.92	4.48	2.44	1.16	0.76		283	229.76	232.52	293.96	283
3407.83	3061.61	2929.47	1767.67	3208.92		1.2	43.04	0.44	16.48	0.32		284.8	284.8	217.8	258.32	210.12
2592.36	2225.83	3727.34	2666.87	2327.02		5.56	30.84	0.08	1.6	2.12		276.36	276.36	256.12	261.08	146.68
2607.54	4277.11	2790.99	2684.68	3184.34		1	0.44	0.72	1.08	0.92		249	249	272.16	252.28	276.08
2787.68	3291.28	3377.41	2984.92	2598.02		1.68	0.2	0.08	0.92	6.12		294.24	272.48	270.68	269.92	293.36
2275.09	1934.84	2745.85	4054.76	2223.09		57.92	3.8	0.8	1.08	2.76		223	257.12	286.56	277.76	227.88
2669.53	2814.54	3908.5	1982.9	3352.95		1.04	0.36	0.24	1.64	0.2		274.8	287.4	260.16	210.92	279
2287	2130.03	2530.95	2988.67	2656.66		0.84	4.08	0.84	8.16	0.36		209.68	228.24	271.92	223.72	281.92
1587.28	1760.91	3890.4	2212.54	2536.95		11.24	5.52	0.48	4.24	3.32		160.96	275.04	246.24	194.64	285.6
3991.73	3405.95	2483.4	2197.13	2706		0.16	0.48	5.16	3.36	1		283.88	270.36	259.2	278.24	250.32
2690.47	3263.03	3616.54	2635.22	2643.45		0.72	46.72	8.2	28.72	0.56		273.76	200.76	278.6	203.92	278.88
2414.25	1993.16	2985.95	3274.4	3802.4		1	61.16	28.2	23.24	0.04		273.24	169.4	199.68	219.88	200.12
734.144	2436.9	4052.12	2555.75	1457.82		49.92	87.76	0.08	10.04	46.96		56.04	170.68	237.84	196.48	41.44
2658.9	3513.3	3070.25	3544.49	2170.92		2.6	22.08	64.84	0	67.36		290.72	292.32	175.84	233.6	173.88
2544.68	4575.7	4017.13	4633.28	3236.25		1.36	10.44	0.2	18.52	8.28		275.8	269.52	256.4	229.4	228.84
1959.59	2545.64	3019.13	3097.08	3609.33		1.96	56.68	48.16	0.24	0.16		267.68	178.12	239.8	247.28	234.96
2753.97	2763.09	3476.48	3683.05	3018.03		0.44	1.2	0.24	0.08	0.32		292.24	156.56	256.12	272.48	235.8
1927.49	4867.07	3311.32	3468.17	3433.35		2.84	0.68	44.56	25.64	11.32		288.6	246.44	271.48	210.56	219.36
4027.23	3380.55	3984.45	3689.35	2029.32		2.32	0.56	12.24	26.16	42.68		283.48	191.88	205.76	218.16	187.84
3112.28	3626.78	4840.41	3099.3	4336.92		0.64	0.56	0.64	0.6	2.56		277	230.48	221.96	167.92	242.52
2234.49		2434.52	2979.36	4715.76		57.36		92.56	63.72	0.04		192.96		167.96	175.36	229.96
3645.77			3810.99	5880.34		19.68			0.16	0		228.04			245.44	242.4
3241.88			2542.68	4654.09		0.56			17.32	0		220.12			221.88	222.72
				2876.57						32.24						230.6
				4306.12						2						173.68
Time in Zone 1 - Speaker (seconds)						Time in Zone 2 - Middle (seconds)						Time in Zone 3 - Far (seconds)
0 Hz	5 Hz	10 Hz	15 Hz	20 Hz		0 Hz	5 Hz	10 Hz	15 Hz	20 Hz		0 Hz	5 Hz	10 Hz	15 Hz	20 Hz
124.24	125.52	121.96	32.32	86.48		54.56	55.48	54.16	16.96	47.48		121.24	119.04	123.92	250.76	166.08
127.12	113.04	119.32	106.84	88.16		64.32	80.64	57.6	87	22.88		108.44	106.36	123.12	106.2	189
120.68	89	96.88	120.68	96.68		67.72	103.08	102.64	53.68	82.32		111.64	107.96	100.52	125.64	121.04
100.64	91.6	135.44	90.88	101.04		77.4	90.04	69.72	89.64	62.96		122	118.4	94.88	119.48	136.04
99.84	97.48	105.12	118.24	89.68		35.12	65.4	81.8	70	52.64		165.08	137.16	113.12	111.8	157.72
115.76	19	107.92	113.88	101.28		53.8	45.88	67.12	60.84	82.12		130.44	235.16	124.96	125.32	116.64
120.12	73.68	114.4	111.24	40.28		66.8	57.88	59	92.28	79		113.12	168.48	126.64	96.52	180.76
118.76	126.72	120	105.96	111.04		70.8	55	64.92	81.2	50.28		110.48	118.32	115.12	112.88	138.72
122.24	123.32	120.52	115.4	103.92		48.32	55.6	62.04	64.64	42.36		129.44	121.12	117.48	120	153.76
85.24	112.96	143.56	71.96	103.12		51.12	58.36	35.2	53.76	77.76		163.68	128.72	121.24	174.32	119.16
125.76	116.28	103.28	82.84	117.76		55	55.88	70.84	92.8	52.52		119.28	127.88	125.56	124.4	129.72
99.56	78.76	102.16	63.08	124.96		79.84	74.64	67.64	95.12	58		120.6	146.56	130.24	141.8	117.08
98.12	67.8	81.16	55.36	92.4		123.24	76.16	69.88	95.4	62.88		78.68	156.08	148.96	149.28	144.76
116.2	64.4	157	82.96	82.56		66.56	60.24	52.76	56.4	81.84		117.28	175.4	90.28	160.6	135.64
123.24	107.16	52.24	154.72	114.68		61.24	105.8	50.48	72.52	63.32		115.44	87.08	197.32	72.8	121.92
109.92	187.76	55.4	107.72	107.84		64.44	61.04	82.52	85.44	78.72		125.64	51.24	162.12	106.88	113.48
9.12	159.76	115.72	101.64	63.36		206	45	73.92	97.56	178.24		84.92	94.92	110.4	100.52	57.92
105.88	159.88	59.12	83.56	26.36		60.68	61.88	107.16	67.56	71.88		133.32	78.28	133.76	148.92	201.8
89	31.68	61.64	75.48	151.48		62.04	50.88	39.88	63.64	85.52		149	217.48	198.52	160.92	63.04
96.32	71.44	150.16	116.4	80.44		62.44	133.72	78.12	69.52	77.52		141.28	94.88	71.68	114.12	142.04
128.64	161.76	85.68	52.32	26.2		47.24	97.28	68.2	44.24	68.92		124.16	41	146.16	203.48	204.92
96.32	85.2	27.68	44.24	64.72		57.28	94.68	79.8	58.28	66.68		146.36	119.52	192.44	197.52	168.64
121.88	108.48	91.56	70.4	224.32		57.4	94.32	96.92	62.24	36.96		120.76	97.24	111.56	167.4	38.76
103.72	95.56	36.28	96.52	86.84		56.92	83.72	66.84	103.48	80.72		139.4	120.76	196.88	100.04	132.48
168.16		181.84	19.96	46.92		91.36		48.6	138.28	57.76		40.52		69.6	140.88	195.36
59.04			58.44	54.76		84.68			46.08	69.92		156.32			195.52	175.36
79.32			22.24	85.12		108.68			48.72	83.92		112.04			229.08	131
				59.04						44.4						196.6
				131.56						105.08						62.88

## Sheet: Treatment Trial
Distance Moved (cm)						Immobility (seconds)						Time in 4.8 cm Thigmotaxis Zone (seconds)
0 Hz	5 Hz	10 Hz	15 Hz	20 Hz		0 Hz	5 Hz	10 Hz	15 Hz	20 Hz		0 Hz	5 Hz	10 Hz	15 Hz	20 Hz
2321.98	121.812	2441.7	2386.28	1693.6		3.88	51.52	0.8	2.64	3		247.96	300.04	262.52	287.32	298.64
2844	2120.22	1819.24	2011.22	85.6213		1.76	1.84	2.56	7.96	47.68		285.84	255.72	289.8	282.24	148.08
1911.88	3079.04	1827.91	2550.55	3048.5		13.84	0.6	2.56	5.12	0.52		284.56	299.2	257.88	267.16	282.56
2740.63	3915.25	1733.75	1826.68	1489.62		2.52	0.28	41.88	30.92	4.96		284.04	292.64	283.16	247.16	279.96
2122.95	1787.78	1641.52	3112.63	2062.7		0.76	2.48	9.88	1.84	2.52		292	284.8	240.36	298.56	280.16
2671.16	1713.59	2956.14	1111.73	2518.88		2.8	4.24	1.56	98.44	1.08		270	291	263.12	295.68	282.64
2064.14	463.116	3834.9	2064.63	1436.42		2.32	64	0.16	91.44	9.28		297.2	299.28	286.76	296.04	115.84
2076.19	2325.95	2245.47	2754.97	1967.03		5.68	2.2	0.84	2.28	2.96		240.32	272.96	294.52	264.64	294.28
1919.58	2097.52	3096.15	3108.08	1967.43		3.72	1.56	0.28	0.68	2.2		296.24	261.44	288.56	271.4	289.28
2010.68	1491	1362.41	3209.7	2041.03		64.2	21.8	52.2	0.76	3.24		285.04	272.44	298.44	294.52	281.04
2282.5	1888.3	2511.04	2134.96	2498.14		2.6	2.4	0.36	1.92	1.72		274.08	226.56	295.72	230.32	295.76
2300.1	1321.66	1793.52	2133.17	2948.25		1.68	31.2	30.08	1.64	0.6		264.6	281.96	282.52	287.12	278.44
656.92	307.672	2251.65	2114.72	1042.39		46.32	52.72	2.52	1.92	59.6		232.44	158.8	290.24	273.84	298.88
3751.88	2517.91	2004.37	2500.99	3178.16		12.28	0.6	1.12	0.48	0.56		288.44	280.88	298.32	298.88	274.36
2163.99	3255.58	3547.38	2548.06	2036.55		2.2	0.28	0.6	0.32	2.6		285.96	296.32	277.36	233.68	263.36
1567.14	2817.96	3242.15	3000.26	4156.62		49.28	1.24	44.08	0	1.96		285.68	211.12	272.4	235.56	168.8
2139.33	3511.97	3540.15	2066.48	1362.37		8.28	0.48	0.36	0.16	5.24		232.04	252.04	115.88	186.32	135.2
1558.05	4605.89	3636.32	3387.11	2715.04		7.6	0.12	0.52	0.16	36.16		292.52	293.24	244.4	274.56	216.76
2060.5	4147.35	4490.45	5491.33	3469.39		1.56	3.84	33.08	6.4	0.04		273.48	283.92	174.6	201.88	234.16
1490.15	2892.82	3442.2	2853.62	3314.94		6.36	0.8	0.52	0.04	0		277.52	212.28	264.4	218.16	274.64
2341.71	3077.41	2984.06	3394.69	3447.23		0.84	0.24	0.48	17.76	0		286.28	194.08	280.24	256.04	255.28
2005.2	4091.78	3788.11	3913.09	2823.53		1.92	0.44	0.44	16.4	0.12		290.88	282.32	295.56	227.6	259.48
2105.55	2790.53	3005.02	3226.3	4010.29		35.24	0.6	0	0.08	57.44		294.44	135.44	219.68	279.56	213.72
1779.57	2801.13	3993.3	2650.5	4001		10.08	0.48	0	0.08	0.08		284.28	250.24	260.32	179.68	278.96
3185.52		3382.46	1680.34	5273.7		0.56		1.8	15.68	0.04		70.44		224.4	279.88	261.88
2775.38			4276.46	5088.09		0.12			0	23.32		229.12			277.64	208.88
3125.7			3519.46	5734.95		25.68			1.96	0.12		210.92			199.36	247.8
				1615.5						0.04						252.44
				3203.85						0.04						228.04
Time in Zone 1 - Speaker (seconds)						Time in Zone 2 - Middle (seconds)						Time in Zone 3 - Far (seconds)
0 Hz	5 Hz	10 Hz	15 Hz	20 Hz		0 Hz	5 Hz	10 Hz	15 Hz	20 Hz		0 Hz	5 Hz	10 Hz	15 Hz	20 Hz
136.16	0	114.56	93.4	280.44		66.44	252.24	68.52	43.88	2.68		97.4	47.8	116.96	162.72	16.92
128.96	109.72	122.28	101.04	0		49.64	76.56	43.68	72.88	0		121.44	113.64	134.08	126.04	148.08
106.8	160.6	116.48	102.52	102.28		60.48	49.88	66.28	68.84	59.16		132.76	89.48	117.28	128.68	138.6
135.84	142.04	200.04	75.44	105.8		47.8	55.76	20.24	63.72	48.16		116.36	102.2	79.76	160.88	146.08
176.4	139.56	104.4	119.84	67.88		37.8	53.72	71.76	53.44	47.32		85.8	106.72	123.88	126.76	184.84
117.52	132.24	145.48	41.44	124.04		70.28	58.84	53.6	11.36	53.32		112.2	108.88	100.92	247.24	122.68
124.64	9.2	114.24	25.56	1.04		47.04	1.52	46.8	94.24	35.96		128.36	289.32	139	180.24	263.04
112.16	101.84	129.16	76.4	93.44		81.72	72.12	37.6	55.88	29.32		106.16	126.08	133.28	167.76	177.24
118.88	120.68	118.24	114.64	123.88		32.12	61.36	56.56	59.04	42.64		149.04	118	125.24	126.36	133.52
112.44	85.04	165.28	155.04	118.16		25.6	122.6	18.88	48.28	61.84		162	92.36	115.88	96.68	120.04
127.24	92.44	111.2	52.44	119.64		59.64	72.52	51.24	97.6	42.4		113.12	135	137.52	150	137.12
114.64	29.52	158.12	114.08	126.76		61.52	22.68	61.76	54.92	53		123.88	247.84	80.12	130.8	120.24
62.84	9.04	129.2	109.92	54.96		171.52	6.88	54.48	59.48	9.76		65.68	284.12	116.24	130.64	235.32
143.68	19.36	152.4	102.12	115.16		59.96	24.32	22.36	60.32	78.04		96.4	256.36	125.28	137.4	106.84
121.4	11.08	56.96	146.36	112.04		62	29.12	54.72	79.52	70.8		116.64	259.84	188.36	74.16	117.16
190.92	135.12	9.76	89.96	76.84		41.68	90.8	19.72	86.64	111.48		67.44	74.12	270.56	123.44	111.72
76.52	76.88	125.72	116.64	42		78.48	66.96	107.96	95.16	124.04		145.04	156.2	66.36	88.24	133.72
114.52	66.36	52.2	67.56	115.4		53.8	53.24	63.08	48.32	32.44		131.72	180.36	184.76	184.04	154.4
103.32	19.92	243.52	49.72	89.52		54.4	20.72	33.12	80.64	76.32		142.32	259.4	23.4	168.88	134.2
106.4	130.16	141.72	132.76	70.68		57.28	85.8	79.04	81.6	87.8		136.36	83.12	79.28	85.68	140.56
142.4	134.92	13.96	25.52	101.64		41.6	85.12	44.32	30.8	71.44		115.92	80	241.76	243.72	126.76
111	76.64	1.12	37.44	18.56		59.84	107.24	4.36	54.44	61.4		129.2	115.48	294.56	208.16	220.08
188.68	107.12	99.2	119.68	148.24		63.16	115.64	81.2	61	94.68		48.2	77.28	119.64	119.36	57.12
123.68	38.8	43.92	91.44	14.32		55.44	25.76	56.28	85.64	24.52		120.92	235.48	199.8	122.96	261.2
115.08		108.16	6.6	19.04		108.16		72	20.44	43.32		76.8		119.56	272.52	237.68
79.76			15.24	53.8		80.36			23.24	76.56		139.92			261.56	169.68
68.08			46.2	19.84		113.88			79.64	34.88		118.08			174.2	245.2
				17.76						30.52						251.76
				94.52						84.76						120.76
